# Supplementary material for: Effect of processing temperature on film properties of ZnO prepared by the aqueous method and related organic photovoltaics and LEDs
Source: Royal Society of Chemistry journal article supplement (doi:10.1039/d0qi00497a), 2020-01-01
Supplement: d0qi00497a1.pdf [file d0qi00497a1.pdf]

## Effect of processing temperature on film properties of ZnO by aqueous method and related organic photovoltaics and LEDs

Jiaqi Zhang<sup>a,c\*</sup>, Hengxiang Yang<sup>a</sup>, Xiaoyu Zhang<sup>a</sup>, Maurizio Morbidoni<sup>b</sup>, Claire H. Burgess<sup>b</sup>, Rebecca Kilmurray<sup>b</sup>, Shouhua Feng<sup>c</sup>, Martyn A. McLachlan<sup>b\*</sup>

<sup>a</sup> College of Materials Science and Engineering, Key Laboratory of Automobile Materials, Ministry of Education, Jilin University, Changchun, 130012, China

<sup>b</sup> Department of Materials and Centre for Plastic Electronics, Imperial College London, London SW7 2AZ, UK

<sup>c</sup> Department of Chemistry and State Key Laboratory of Inorganic Synthesis and Preparative Chemistry, Jilin University, Changchun 130012, P.R. China.

Email: zhangjiaqi@jlu.edu.cn; martyn.mclachlan@imperial.ac.uk

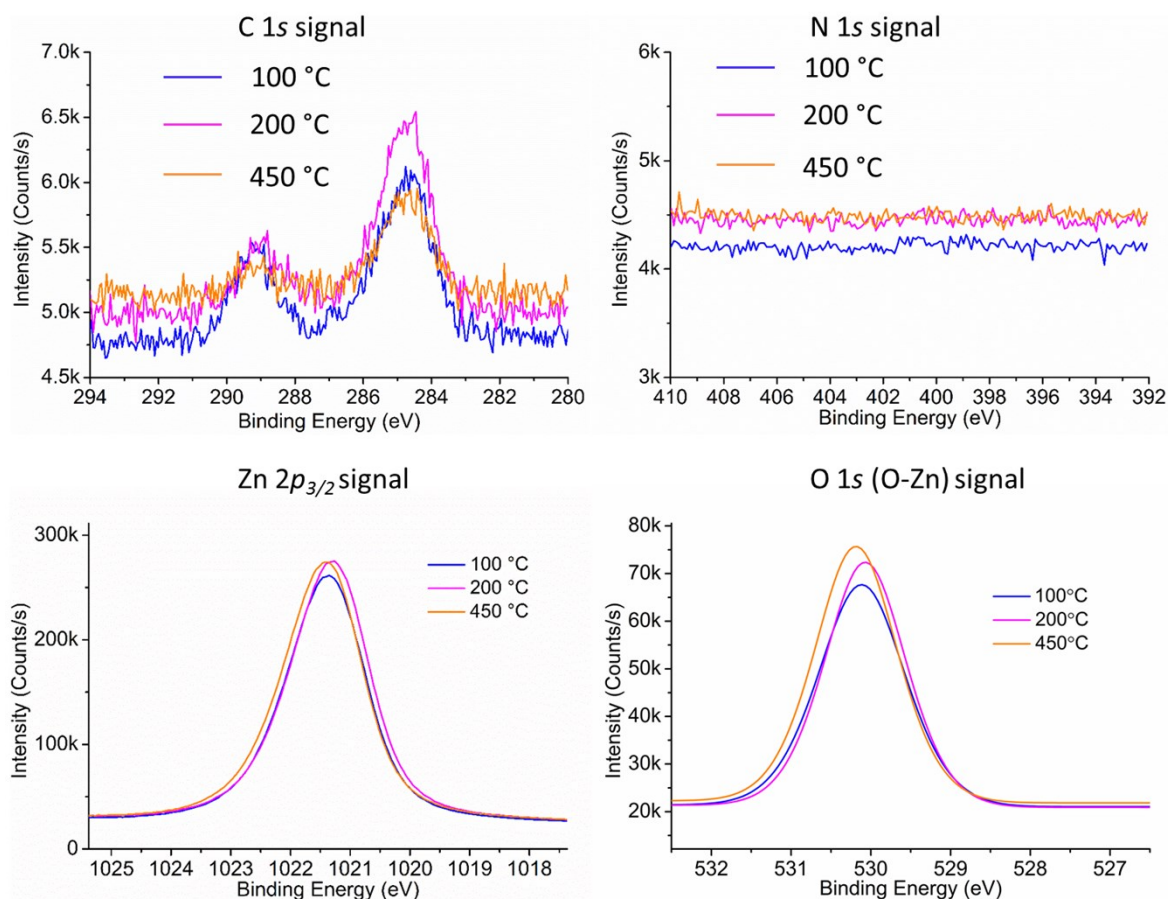

**Supporting Figure 1** XPS spectra of ZnO with different processing temperatures: a) C 1s signal, used to align the B.E. positions of all spectra, b) N 1s signal, no nitrogen signal is detected even at 100 °C processed ZnO surface c) Zn 2p and d) O 1s (O-Zn), indicating the  $E_F$  shift with ZnO annealing temperatures.

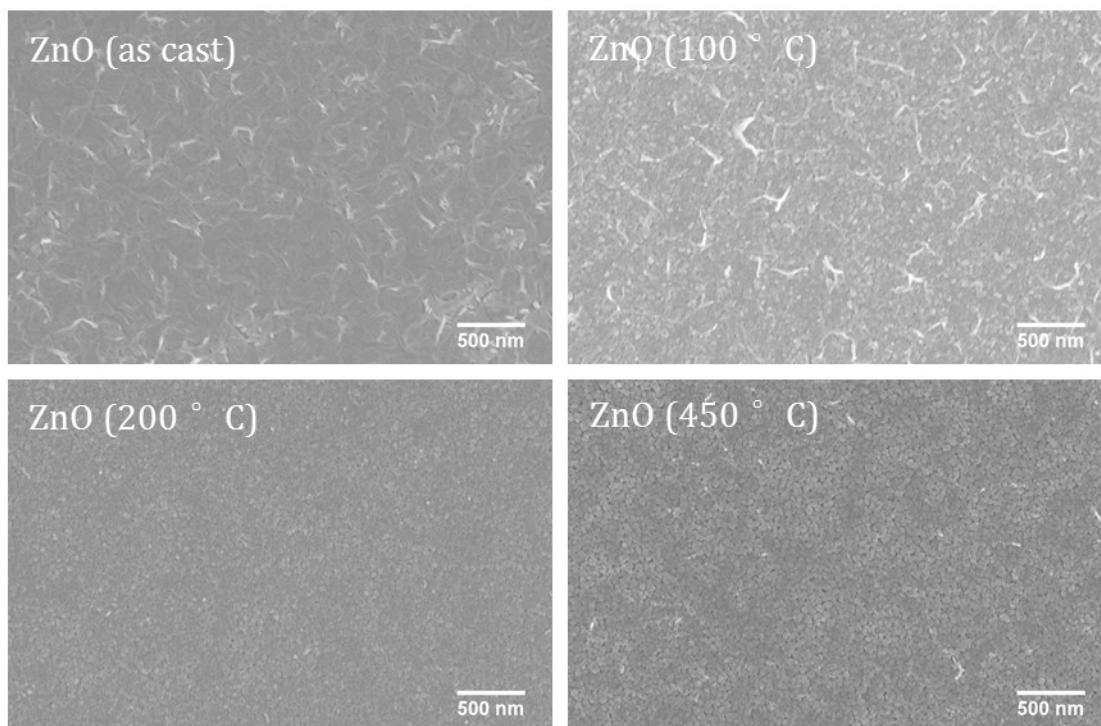

**Supporting Figure 2** Large area SEM images of ZnO films showing fully covered and compact surface morphologies for films with all processing temperatures.

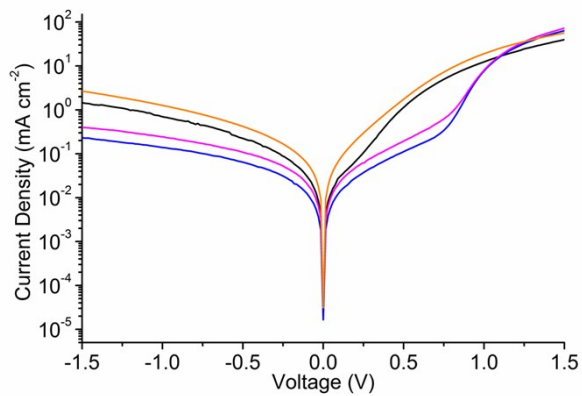

**Supporting Figure 3** Representative dark J-V curves for devices prepared using ZnO electron transport layers (ETLs) deposited at the temperatures indicated.

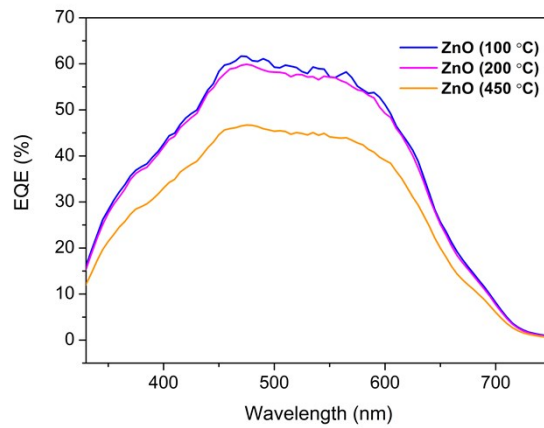

**Supporting Figure 4** The external quantum efficiency (EQE) spectra of OPVs with ZnO ETLs. Calculated  $J_{SC}$  values are 9.29, 9.05 and 7.1  $\text{mA}/\text{cm}^2$  for 100 °C, 200 °C and 450 °C annealed ZnO ETLs, respectively.

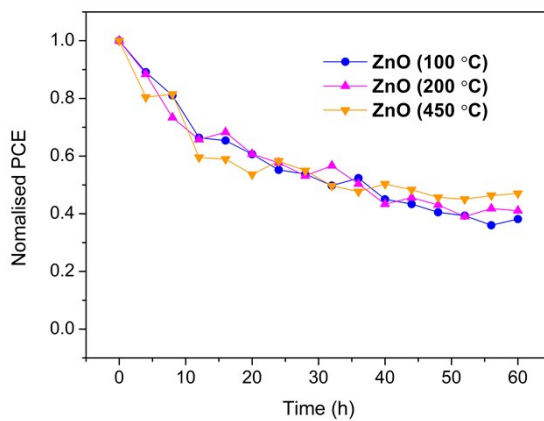

**Supporting Figure 5** The stability of OPV devices under 1 sun illumination for 60 h, with ZnO ETLs annealed at different temperatures.

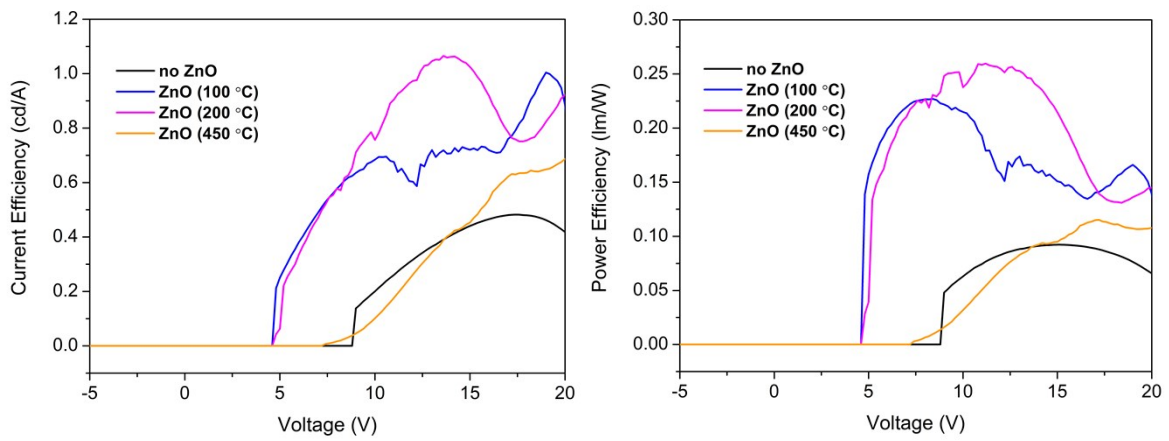

**Supporting Figure 6** The current efficiency (left) and the power efficiency (right) spectra of OLEDs with ZnO ETLs.

**Supporting Table 1** Performance metrics of OLED devices measured over the range of ETL processing temperatures.

| Sample       | Maximum current efficiency (Cd/A) | Voltage at maximum current efficiency (V) | Power efficiency at maximum current efficiency (Lm/W) | Luminance at maximum current efficiency (Cd/m <sup>2</sup> ) | Current density at maximum current efficiency (mA/cm <sup>2</sup> ) | Turn-on voltage (V) |
|--------------|-----------------------------------|-------------------------------------------|-------------------------------------------------------|--------------------------------------------------------------|---------------------------------------------------------------------|---------------------|
| No ZnO       | 0.45                              | 17.8                                      | 0.08                                                  | 470                                                          | 105.21                                                              | 6.4                 |
| ZnO (100 °C) | 1.00                              | 19.0                                      | 0.17                                                  | 4160                                                         | 414.00                                                              | 2.6                 |
| ZnO (200 °C) | 1.03                              | 13.2                                      | 0.25                                                  | 640                                                          | 62.10                                                               | 2.6                 |
| ZnO (450 °C) | 0.67                              | 21.4                                      | 0.10                                                  | 2970                                                         | 443.00                                                              | 5.4                 |
